# Supplementary material for: Tunable photoluminescence and SERS behaviour of additively manufactured Au nanoparticle patterns
Source: Royal Society of Chemistry journal article supplement (doi:10.1039/d1ra02266k), 2021-01-01
Supplement: d1ra02266k1.pdf [file d1ra02266k1.pdf]

## Supporting information

### *Tunable Photoluminescence and SERS behaviour of additively manufactured Au nanoparticle patterns*

**Saleh Aghajani<sup>1,\*</sup>, Angelo Accardo<sup>1</sup> and Marcel Tichem<sup>1</sup>**

<sup>1</sup>Delft University of Technology, Faculty of Mechanical, Maritime, and Materials Engineering (3ME), Department of Precision and Microsystems Engineering (PME), Mekelweg 2, Delft, 2628 CD, The Netherlands

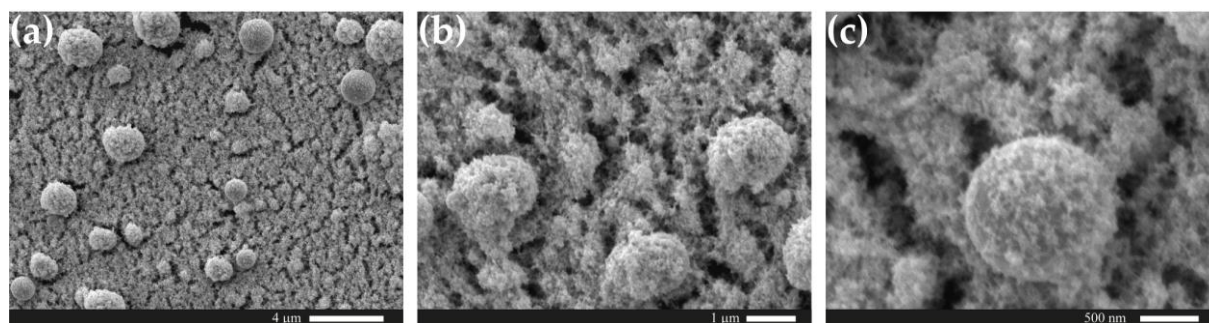

**Figure S 1.** SEM images of the AuNPs deposited on a silicon substrate with SAM voltage/current setting of  $V=0.9$  kV,  $I=5$  mA  
a) Low magnification of Microparticles together with agglomeration of primary nanoparticles , and high magnification of b)  
agglomeration of primary nanoparticles on the microparticles and , c) microparticles in the film of AuNPs.

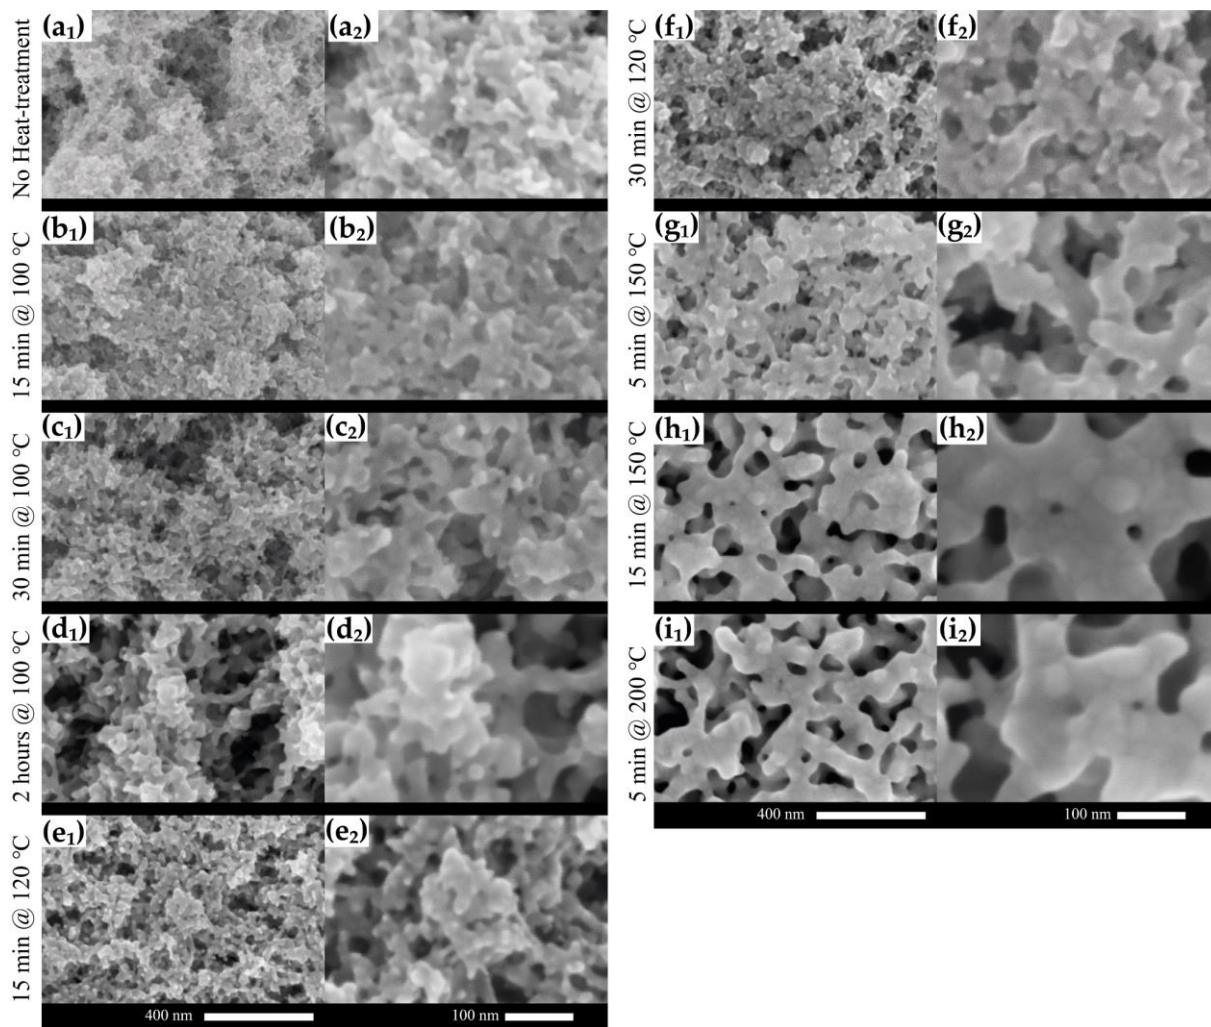

**Figure S 2.** (a1, a2) SEM images of the morphology of AuNPs deposited on centric region of the line and the boundary (Sample 1), and the same comparison for thermal treated samples as (b1, b2) 15 minutes at 100 °C (Sample 2), (c1, c2) 30 minutes at 100 °C (Sample 3), (d1, d2) 120 minutes at 100 °C (Sample 4), (e1,e2) 15 minutes at 120 °C (Sample 5), (f1, f2) 30 minutes at 120 °C (Sample 6), (g1, g2) 5 minutes at 150 °C (Sample 7), (h1, h2) 15 minutes at 150 °C (Sample 8), (i1, i2) 5 minutes at 200 °C (Sample 9). All AuNPs deposited with SAM voltage/current setting of V = 0.9 kV and I = 5 mA.

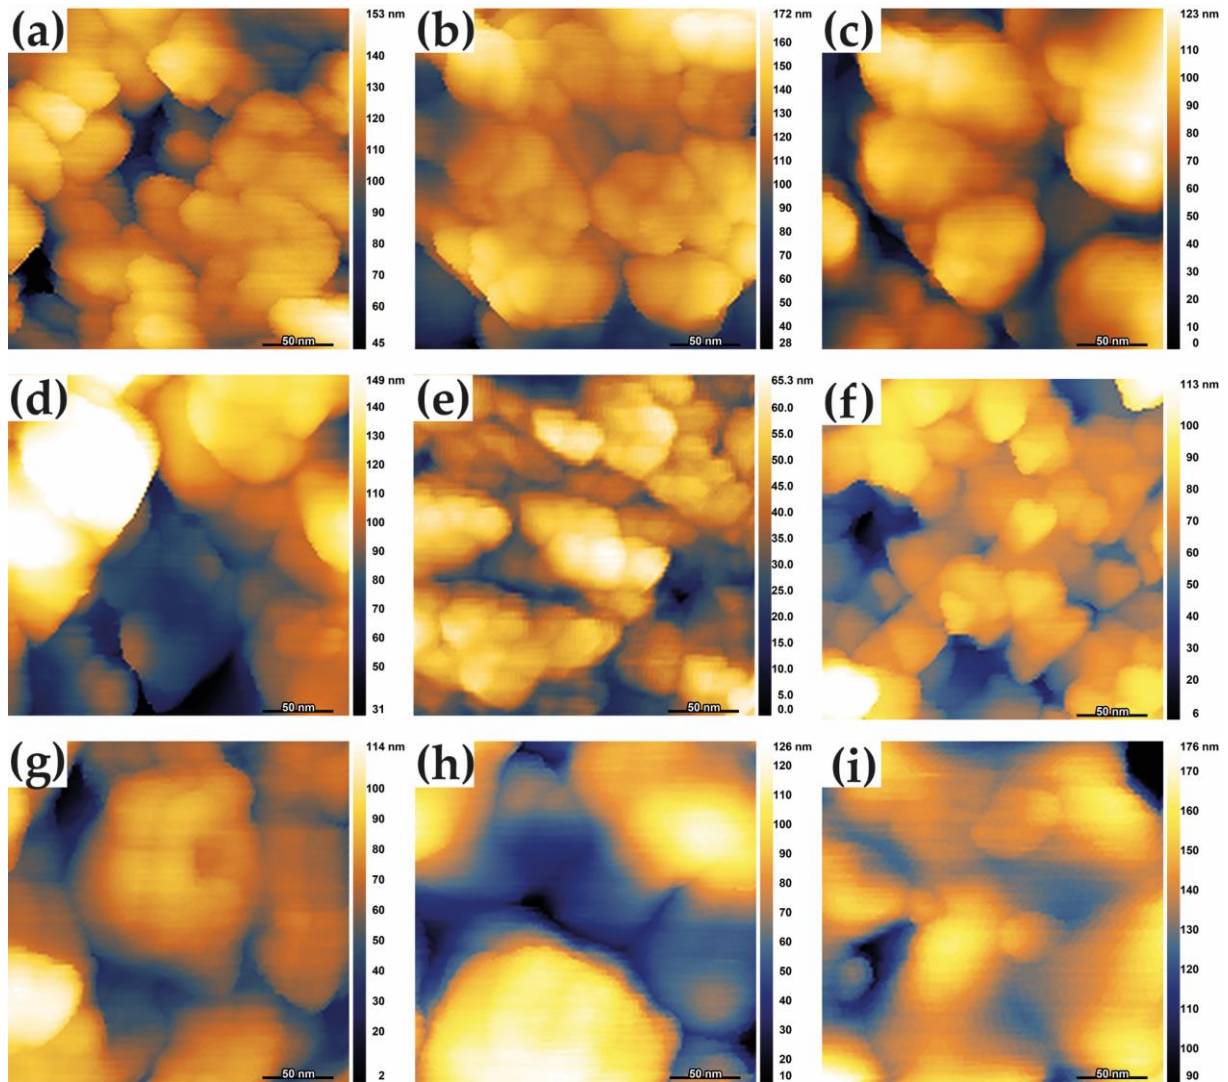

**Figure S 3.** AFM morphology of  $250 \times 250 \text{ nm}^2$  areas of a) non-heat treated samples (b) 15 minutes at  $100^\circ\text{C}$ , (c) 30 minutes at  $100^\circ\text{C}$ , (d) 120 minutes at  $100^\circ\text{C}$ , (e) 15 minutes at  $120^\circ\text{C}$ , (f) 30 minutes at  $120^\circ\text{C}$ , (g) 5 minutes at  $150^\circ\text{C}$ , (h) 15 minutes at  $150^\circ\text{C}$ , (i) 5 minutes at  $200^\circ\text{C}$ .

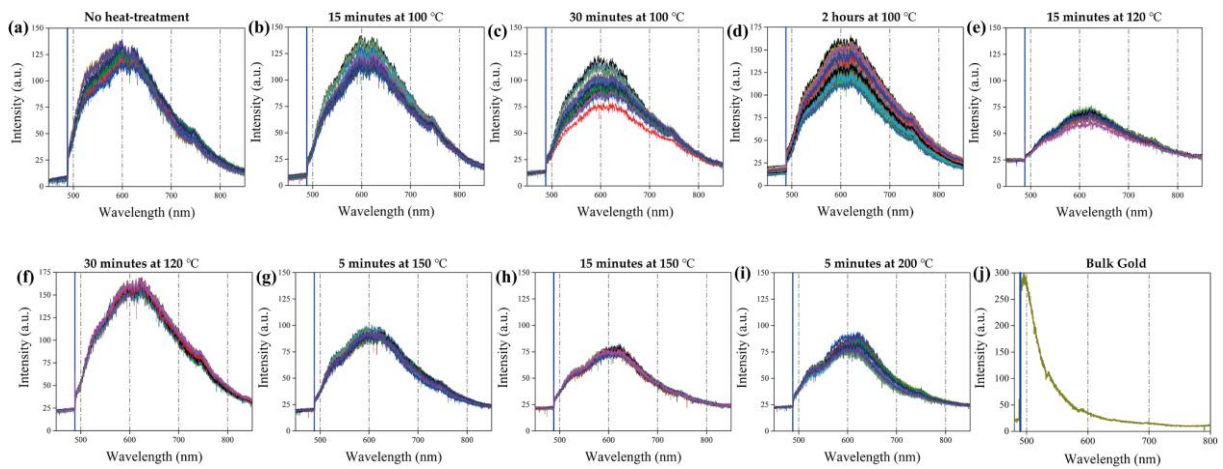

**Figure S 4.** The photoluminescence response spectra of a) non-thermally treated sample, b) 15 minutes at  $100^\circ\text{C}$ , c) 30 minutes at  $100^\circ\text{C}$ , d) 120 minutes at  $100^\circ\text{C}$ , e) 15 minutes at  $120^\circ\text{C}$ , f) 30 minutes at  $120^\circ\text{C}$ , g) 5 minutes at  $150^\circ\text{C}$ , h) 15 minutes at  $150^\circ\text{C}$ , i) 5 minutes at  $200^\circ\text{C}$ , and j) Bulk gold, under laser excitation 488 nm. PL measurement conditions: grating



of 600 gr cm<sup>-3</sup>, objective lens = 10× (NA = 0.25); acquisition time = 20 s, integration time = 1. For all lasers, 30 measurements (3 in length × 10 in cross-section) were performed. All AuNPs deposited with SAM voltage/current setting of V=0.9 kV and I=5mA

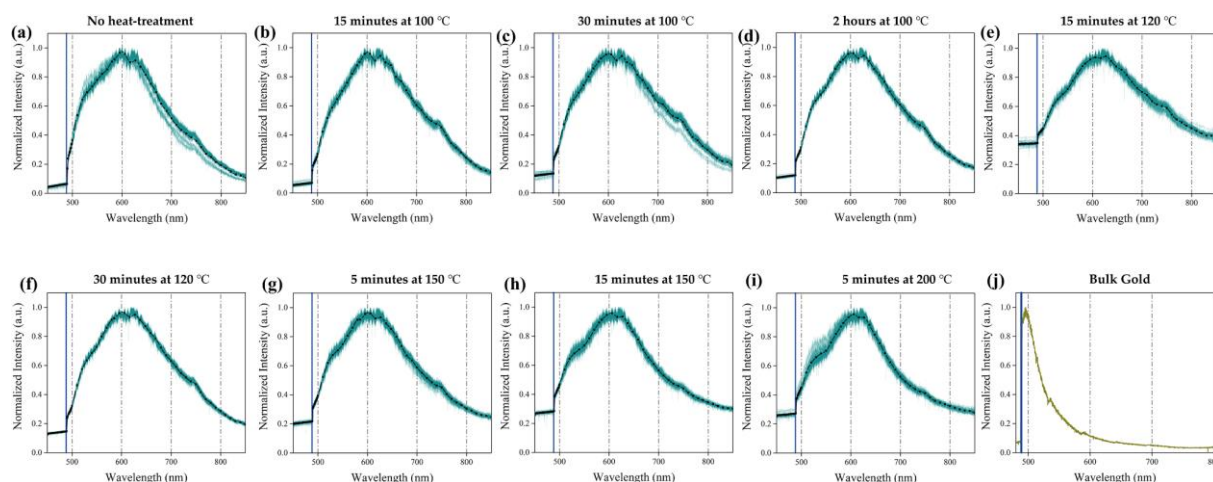

**Figure S 5.** The normalized photoluminescence response spectra with peak of a) non-thermally treated sample, b) 15 minutes at 100 °C, c) 30 minutes at 100 °C, d) 120 minutes at 100 °C, e) 15 minutes at 120 °C, f) 30 minutes at 120 °C, g) 5 minutes at 150 °C, h) 15 minutes at 150 °C, i) 5 minutes at 200 °C, and j) Bulk gold, under laser excitation 488 nm. PL measurement conditions: grating of 600 gr cm<sup>-3</sup>, objective lens = 10× (NA = 0.25); acquisition time = 20 s, integration time = 1. For all lasers, 30 measurements (3 in length × 10 in cross-section) were performed. All AuNPs deposited with SAM voltage/current setting of V=0.9 kV and I=5mA.

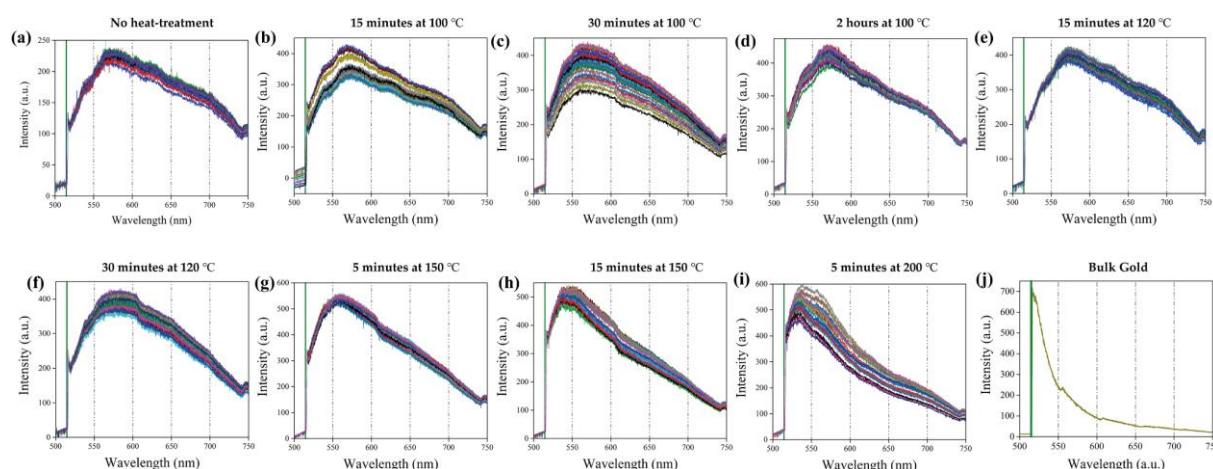

**Figure S 6.** The photoluminescence response spectra of a) non-thermally treated sample, b) 15 minutes at 100 °C, c) 30 minutes at 100 °C, d) 120 minutes at 100 °C, e) 15 minutes at 120 °C, f) 30 minutes at 120 °C, g) 5 minutes at 150 °C, h) 15 minutes at 150 °C, i) 5 minutes at 200 °C, and j) Bulk gold, under laser excitation 514 nm. PL measurement conditions: grating of 600 gr cm<sup>-3</sup>, objective lens = 10× (NA = 0.25); acquisition time = 10 s, integration time = 2. For all lasers, 30 measurements (3 in length × 10 in cross-section) were performed. All AuNPs deposited with SAM voltage/current setting of V=0.9 kV and I=5mA.

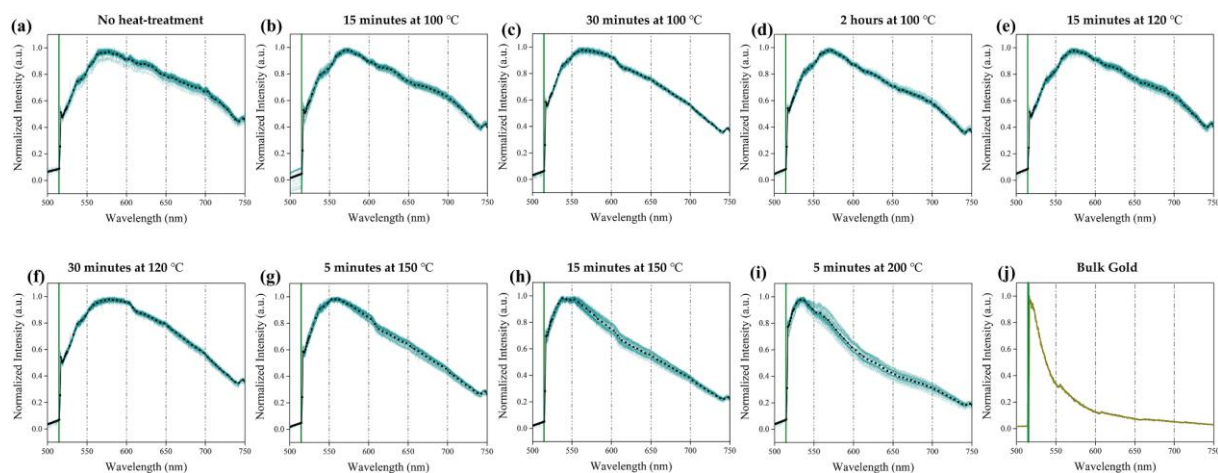

**Figure S 7.** The normalized photoluminescence response spectra with peak of a) non-thermally treated sample, b) 15 minutes at 100 °C, c) 30 minutes at 100 °C, d) 120 minutes at 100 °C, e) 15 minutes at 120 °C, f) 30 minutes at 120 °C, g) 5 minutes at 150 °C, h) 15 minutes at 150 °C, i) 5 minutes at 200 °C, and j) Bulk gold, under laser excitation 514 nm. PL measurement conditions: grating of 600 gr cm<sup>-3</sup>, objective lens = 10× (NA = 0.25); acquisition time = 10 s, integration time = 2. For all lasers, 30 measurements (3 in length × 10 in cross-section) were performed. All AuNPs deposited with SAM voltage/current setting of V=0.9 kV and I=5mA.

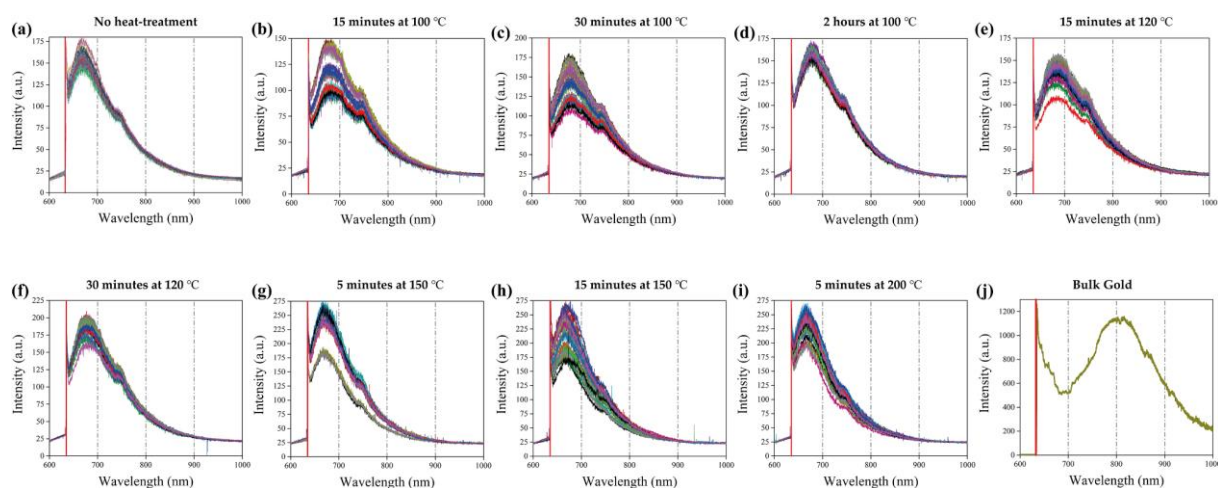

**Figure S 8.** The photoluminescence response spectra of a) non-thermally treated sample, b) 15 minutes at 100 °C, c) 30 minutes at 100 °C, d) 120 minutes at 100 °C, e) 15 minutes at 120 °C, f) 30 minutes at 120 °C, g) 5 minutes at 150 °C, h) 15 minutes at 150 °C, i) 5 minutes at 200 °C, and j) Bulk gold, under laser excitation 633 nm. PL measurement conditions: grating of 600 gr cm<sup>-3</sup>, objective lens = 10× (NA = 0.25); acquisition time = 10 s, integration time = 1. For all lasers, 30 measurements (3 in length × 10 in cross-section) were performed. All AuNPs deposited with SAM voltage/current setting of V=0.9 kV and I=5mA.

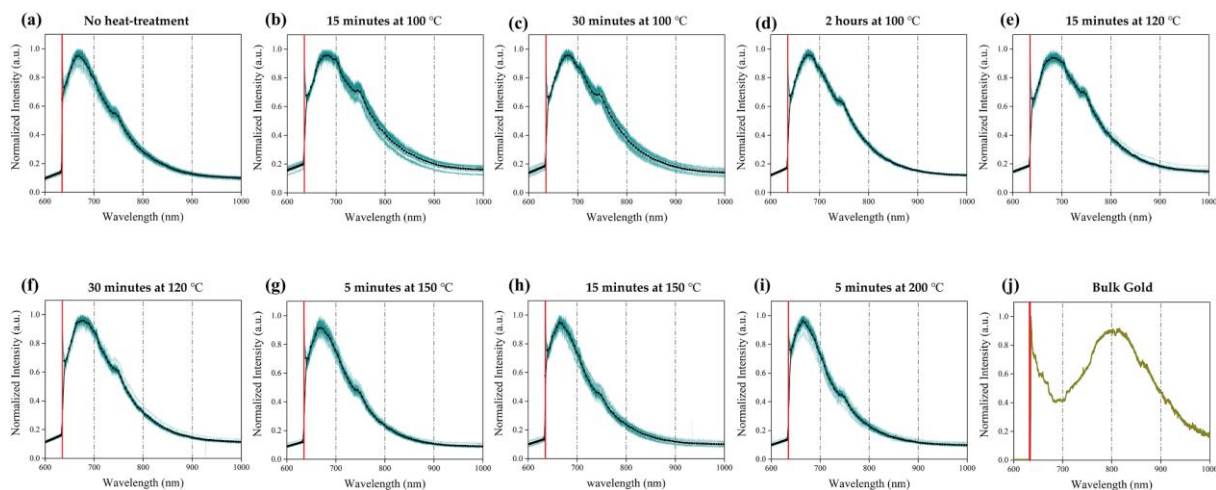

**Figure S9.** The normalized photoluminescence response spectra with peak of a) non-thermally treated sample, b) 15 minutes at 100 °C, c) 30 minutes at 100 °C, d) 120 minutes at 100 °C, e) 15 minutes at 120 °C, f) 30 minutes at 120 °C, g) 5 minutes at 150 °C, h) 15 minutes at 150 °C, i) 5 minutes at 200 °C, and j) Bulk gold, under laser excitation 633 nm. PL measurement conditions: grating of 600 gr cm<sup>-3</sup>, objective lens = 10× (NA = 0.25); acquisition time = 10 s, integration time = 1. For all lasers, 30 measurements (3 in length × 10 in cross-section) were performed. All AuNPs deposited with SAM voltage/current setting of V=0.9 kV and I=5mA.
